# Supplementary material for: Enhanced tribological performance of PEEK/SCF/PTFE hybrid composites by graphene
Source: Royal Society of Chemistry journal article supplement (doi:10.1039/c7ra04969b), 2017-01-01
Supplement: c7ra04969b1.pdf [file c7ra04969b1.pdf]

# Supporting Information

## **Enhanced tribological performance of PEEK/SCF/PTFE hybrid composites by graphene**

**Liu Liu, Fei Yan, Fangyuan Gai, Linghan Xiao, Lei Shang,  
Ming Li\*, Yuhui Ao\***

*Jilin Province Key Laboratory of Carbon Fiber Development and  
Application, College of Chemistry and Life Science, Changchun  
University of Technology, Changchun 130012, China*

*E-mail address: aoyuhui@ccut.edu.cn, liming15@ccut.edu.cn*

*Tel: +86-431-85968078. Fax: +86-431-85968078*

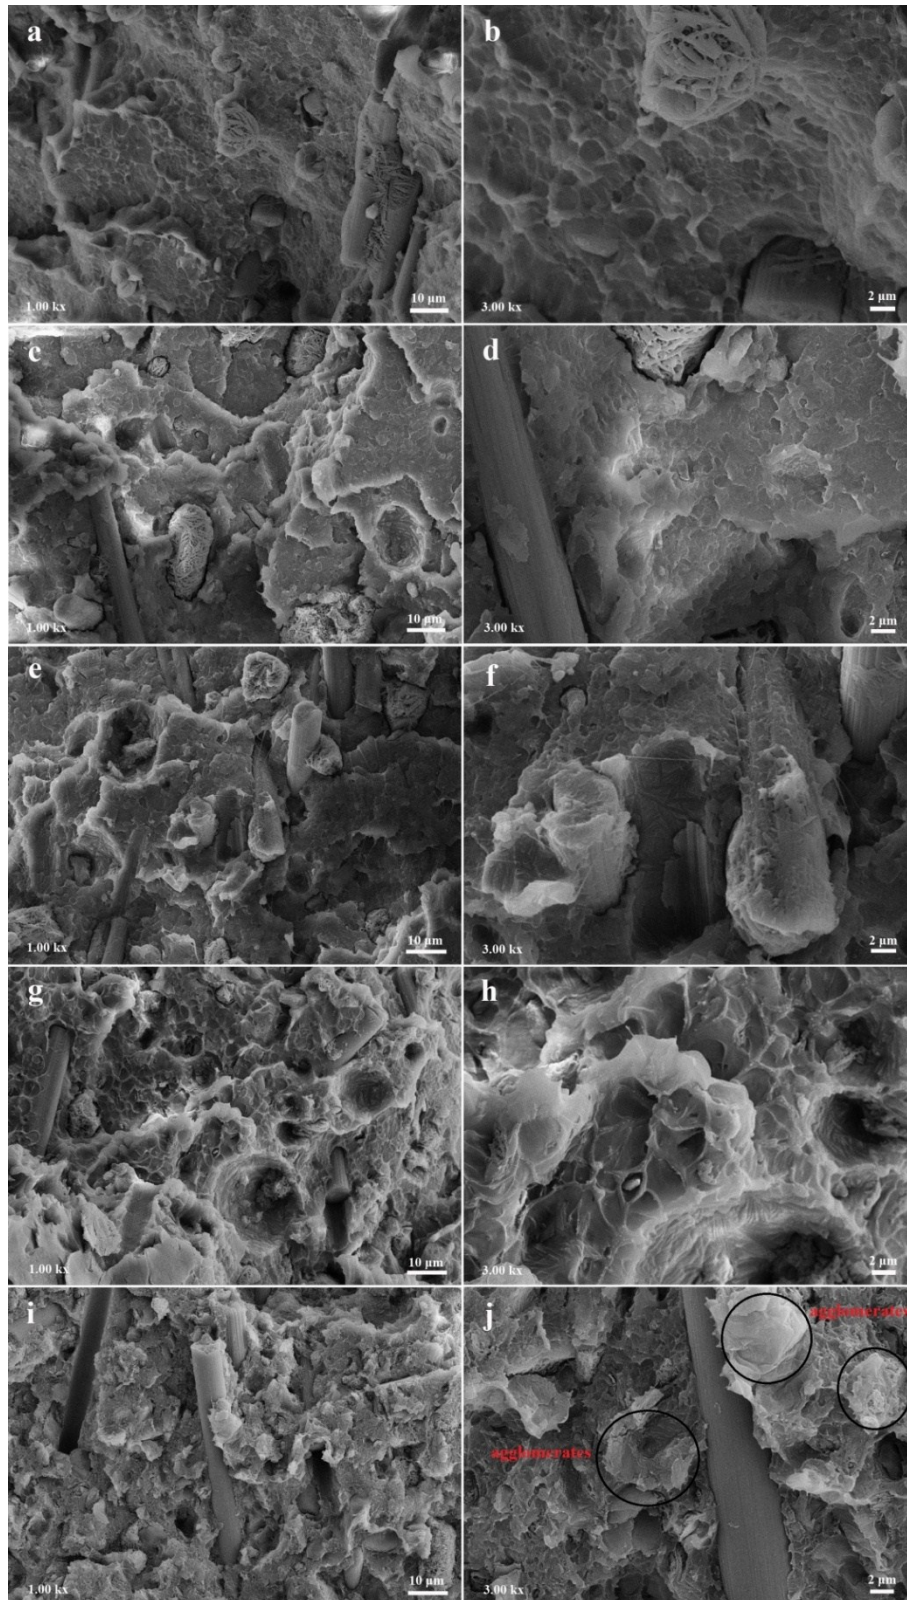

**Fig. S1** SEM micrographs of fracture surfaces of (a-b) PSP, (c-d) PSP0.5GE, (e-f) PSP1.0GE, (g-h) PSP2.0GE and (i-j) PSP3.0GE composites. The circle shows the aggregation of GE in the PEEK.

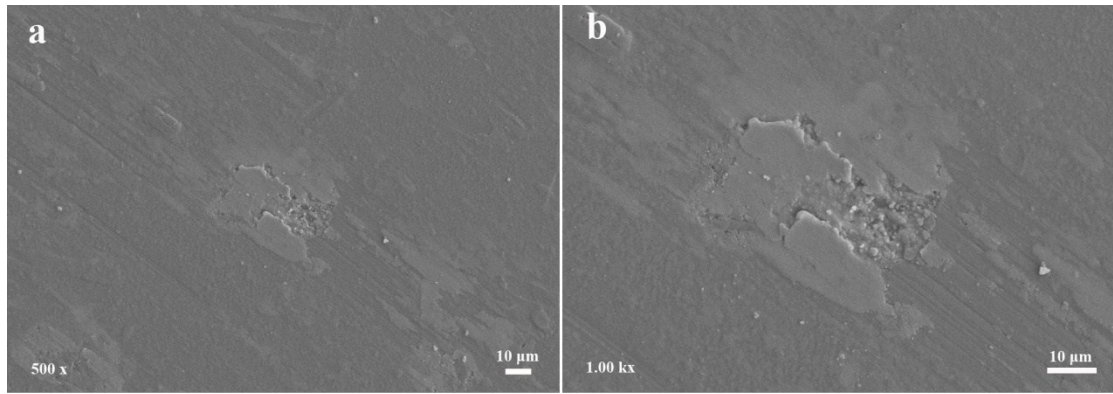

**Fig. S2** SEM micrographs of worn surfaces of PSP3.0GE composites. (4 MPa, 1 m/s, 25 °C)

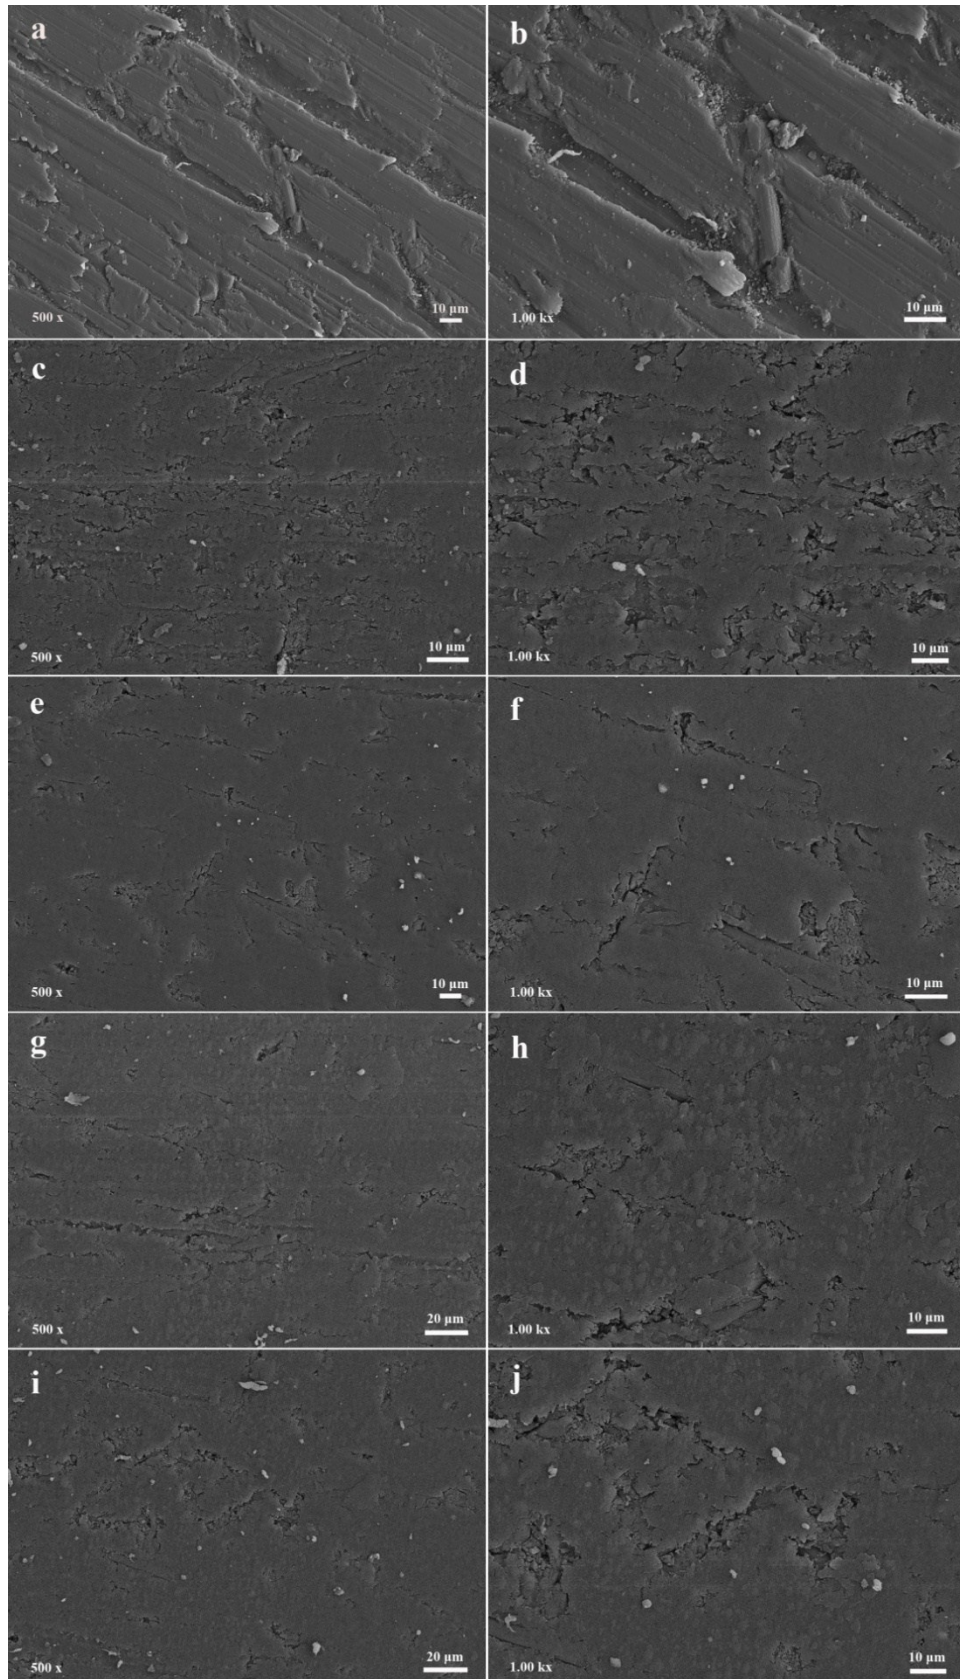

**Fig. S3 SEM micrographs of worn surfaces of (a-b) PSP, (c-d) PSP0.5GE, (e-f) PSP1.0GE, (g-h) PSP2.0GE and (i-j) PSP3.0GE composites. (4 MPa, 2 m/s, 150 °C)**



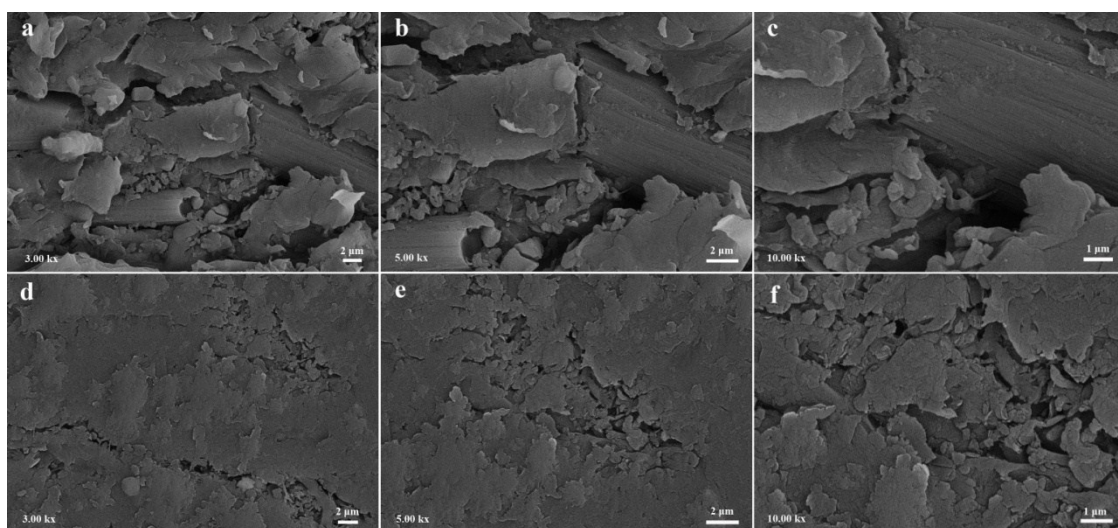

**Fig. S4** SEM micrographs of worn surfaces of (a-c) PSP2.0graphite composites and (d-f) PSP2.0GE composites. (4 MPa, 2 m/s, 150 °C)
